# Supplementary material for: Efficient carrier transfer induced by Au nanoparticles for photoelectrochemical nitrogen reduction
Source: Royal Society of Chemistry journal article supplement (doi:10.1039/d2se01201d), 2022-12-20
Supplement: d2se01201d1.pdf [file d2se01201d1.pdf]

## Supporting Information

### Efficient Carrier Transfer Induced by Au Nanoparticles for Photoelectrochemical Nitrogen Reduction

*Jiixin Liu,<sup>a,b</sup> Fengying Zhang,<sup>\*a,b</sup> Haoran Wu,<sup>b</sup> Yuman Jiang,<sup>b</sup> Peng Yang,<sup>b</sup> Wei Zhang,<sup>d</sup> Heng Guo,<sup>\*a,b</sup> Yuehan Cao,<sup>b</sup> Guidong Yang<sup>c</sup> and Ying Zhou<sup>\*a,b</sup>*

<sup>a</sup> State Key Laboratory of Oil and Gas Reservoir Geology and Exploitation, Southwest Petroleum University, Chengdu 610500, China.

<sup>b</sup> School of New Energy and Materials, Southwest Petroleum University, Chengdu 610500, China.

<sup>c</sup> XJTU-Oxford Joint International Research Laboratory of Catalysis, School of Chemical Engineering and Technology, Xi'an Jiaotong University, Xi'an 7010049, China.

<sup>d</sup> School of Physics and Materials Science, Guangzhou University, Guangzhou 510006, China.

# 1. Experimental Section

## 1.1 Materials

Titanium dioxide (TiO<sub>2</sub>, 99.8% metals basis), Ethyl cellulose ((C<sub>12</sub>H<sub>22</sub>O<sub>5</sub>)<sub>n</sub>, CP), Salicylic acid (C<sub>7</sub>H<sub>6</sub>O<sub>3</sub>, AR), Sodium citrate tribasic dihydrate (C<sub>6</sub>H<sub>5</sub>Na<sub>3</sub>O<sub>7</sub>·H<sub>2</sub>O, AR), para-(dimethylamine)benzaldehyde (C<sub>9</sub>H<sub>11</sub>NO, AR) and Sodium hypochlorite solution (NaClO, AR) were purchased from Aladdin Reagent Corp. Sodium nitroprusside (C<sub>5</sub>H<sub>4</sub>FeN<sub>6</sub>Na<sub>2</sub>O<sub>3</sub>, AR) were purchased from Sigma-Aldrich. Chloroauric acid (HAuCl<sub>4</sub>, 48~50% Au basis) and Triton X-100 (C<sub>14</sub>H<sub>22</sub>O(C<sub>2</sub>H<sub>4</sub>O)<sub>n</sub>, AR) were purchased from Macklin Reagent Corp. Sodium Carbonate Anhydrous (Na<sub>2</sub>CO<sub>3</sub>, AR), Sodium borohydride (NaBH<sub>4</sub>, AR), Sulfuric Acid (H<sub>2</sub>SO<sub>4</sub>), Hydrochloric Acid (HCl, 36~38%), sodium hydroxide (NaOH, GR) and Ethanol (C<sub>2</sub>H<sub>6</sub>O, GR) were purchased from Chengdu Kelong Chemical Reagent Corp. N<sub>2</sub> (99.999%) and Ar (99.999%) were provided by Chengdu Keyuan Gas Corp.

## 1.2 Characterization

The X-ray diffraction (XRD) data were acquired by a PANalytical X'pert diffractometer (Holland) with a Cu K $\alpha$  ray (45 kV, 35 mA). The morphologies and compositions of these samples were observed with transmission electron microscopy (TEM) images. High-resolution TEM (HRTEM) images were obtained on a JEOL JEM-F200 (Japan) equipped with an energy dispersive X-ray spectrometer (JED-2300T), operating at 200 kV. The UV-vis diffuse reflectance spectra were recorded at room temperature on a Shimadzu UV-2600 spectrophotometer with an integrating sphere using Ba<sub>2</sub>SO<sub>4</sub> as the reflectance standard. And the reflectance is converted into absorption value using the Kubelka-Munk function:

$$F(R_{\infty}) = K/S = \frac{(1 - R_{\infty})^2}{2R_{\infty}}$$

where  $K$  is the absorption coefficient,  $S$  is the scattering coefficient, and  $R_{\infty}$  is the limit value of the reflection coefficient  $R$  of the infinitely thick samples.

The photoluminescence (PL) spectra measurements were performed using a Hitachi

F-7000 fluorescence spectrophotometer. X-ray photoelectron spectroscopy (XPS, Thermo Scientific K-Alpha) were collected using monochromatic Al K $\alpha$  X-ray (1486.6 eV) as the excitation source, and the spectra were corrected by C 1s spectra (284.8 eV). Transient absorption spectroscopy was measured by a HARPIA-TA spectroscopy system (HARPIA, Light conversion) using PHAROS (1030 nm, pulse width  $\sim$  190 fs, repetition rate 100 kHz, Light Conversion) as the fundamental laser source.

### 1.3 Product Analysis

Determination of Ammonia: Indophenol blue method was implemented to determine the concentration of obtained ammonia. Typically, 2 mL of the reaction solution was collected from the cathode chamber into a separate container, and 2 mL of NaOH solution (1 M) containing C<sub>7</sub>H<sub>6</sub>O<sub>3</sub> (5%) and C<sub>6</sub>H<sub>5</sub>Na<sub>3</sub>O<sub>7</sub>·H<sub>2</sub>O (5%) was added. Subsequently, 1 mL of NaClO (0.05 M) and 0.2 mL of C<sub>5</sub>FeN<sub>6</sub>Na<sub>2</sub>O (1 wt %) were added to above solution. The absorbance of the solution at 655 nm was measured by UV-vis absorption spectroscopy after keeping for 2 h at ambient environment. The calibration curve was constructed using standard ammonia solution with a series of concentrations.

Determination of Hydrazine: Watt and Chrisp method was conducted to determine the concentration of obtained N<sub>2</sub>H<sub>4</sub>. Generally, 2 mL of coloring reagent (a mixture of para-(dimethylamine)benzaldehyde (0.599 g), 3 mL HCl (12 mol L<sup>-1</sup>) and 30 mL ethanol) was added into 2 mL electrolyte. The absorbance of the solution at 455 nm was measured by UV-vis absorption spectroscopy. The calibration curve was constructed using standard hydrazine hydrate solution with a series of concentrations.

Calculation of NH<sub>3</sub> Yield Rate: The yield rate of ammonia can be calculated by the following equation:

$$c_{NH_3} = [NH_3] \times V / (t \times A_{cat.})$$

where [NH<sub>3</sub>] denotes the concentration of ammonia,  $V$  is the volume of electrolyte,  $t$  is the duration of electrolysis, and  $A$  is the area of catalyst loaded

on the working electrode.

Calculation of Faradaic Efficiency: The Faradaic efficiency can be calculated by the following equation:

$$FE = 3 \times F \times [NH_3] \times V / (17 \times Q)$$

where  $F$  is Faraday constant and  $Q$  is the total charge passing through the electrode during electrolysis.

#### 1.4 DFT Calculation

All computations were performed in the Vienna ab initio simulation package (VASP) within the framework of the density functional theory (DFT) and the projector augmented plane-wave approach. The plane wave energy cut-off is fixed at 380 eV. In the iterative solution of the Kohn-Sham equation, the energy constraint is established at  $10^{-5}$  eV. The calculation was completed on the  $4 \times 4 \times 1$  supercell on the (101) surface of anatase  $TiO_2$ . A vacuum space exceeding 15 Å was employed to avoid the interaction between two periodic units. For all NRR, the Gibbs free energy ( $\Delta G$ ) was described as follows.

$$\Delta G = \Delta E + \Delta E_{ZPE} - T\Delta S$$

where,  $\Delta E$  denoted the energy of adsorption,  $\Delta E_{ZPE}$  represent the zero-point energy changes,  $T=298.15$  K (room temperature), and  $\Delta S$  is the variations in entropy.

## 2 Additional tables and figures

**Table S1** Annealing conditions for synthesis of catalysts.

| Samples                                 | Temperature (°C) | Time (h) |
|-----------------------------------------|------------------|----------|
| <b>Au<sub>3.0</sub>-TiO<sub>2</sub></b> | 80               | 20       |
| <b>Au<sub>4.4</sub>-TiO<sub>2</sub></b> | 400              | 1        |
| <b>Au<sub>6.0</sub>-TiO<sub>2</sub></b> | 400              | 2        |

**Table S2** Fitting parameters for Au-TiO<sub>2</sub>:

$$Y(x) = A * \exp\left(-\left(\frac{1}{\tau_1}\right) * x\right) + B * \exp\left(-\left(\frac{1}{\tau_2}\right) * x\right) + C * \exp\left(-\left(\frac{1}{\tau_3}\right) * x\right)$$

| Samples                                 | A    | $\tau_1$ (ps) | B    | $\tau_2$ (ps) | C    | $\tau_3$ (ps) |
|-----------------------------------------|------|---------------|------|---------------|------|---------------|
| <b>Au<sub>3.0</sub>-TiO<sub>2</sub></b> | 0.61 | 2.67          | 0.28 | 21.30         | 0.11 | 400.75        |
| <b>Au<sub>4.4</sub>-TiO<sub>2</sub></b> | 0.73 | 3.55          | 0.18 | 19.68         | 0.09 | 195.27        |
| <b>Au<sub>6.0</sub>-TiO<sub>2</sub></b> | 0.74 | 3.79          | 0.17 | 35.71         | 0.09 | 333.94        |

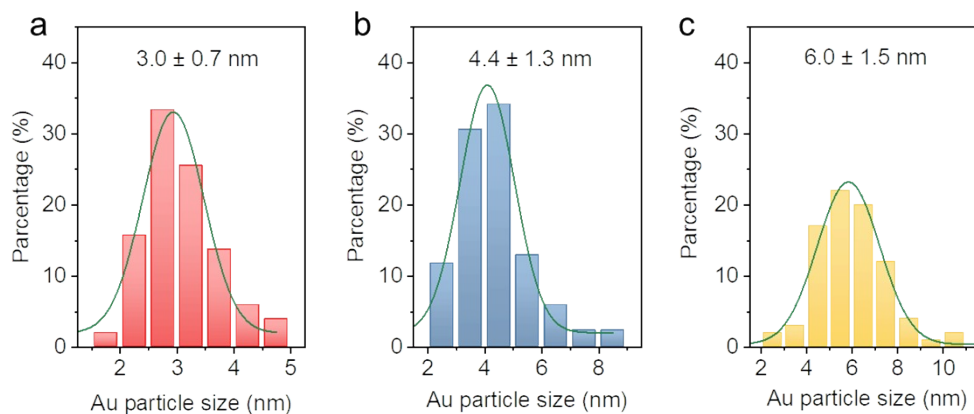

**Fig. S1** The size distributions of Au NPs: (a)  $\text{Au}_{3.0}\text{-TiO}_2$ , (b)  $\text{Au}_{4.4}\text{-TiO}_2$ , and (c)  $\text{Au}_{6.0}\text{-TiO}_2$ .

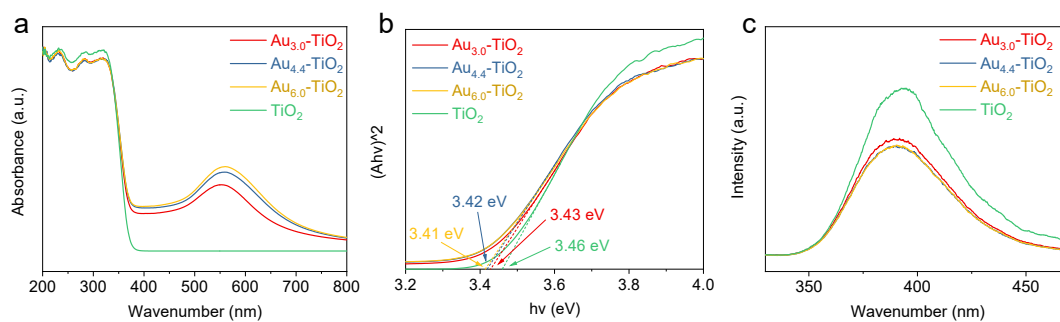

**Fig. S2** (a) UV-vis diffuse reflectance spectra; (b) Tauc plots and (c) PL spectra of the samples.

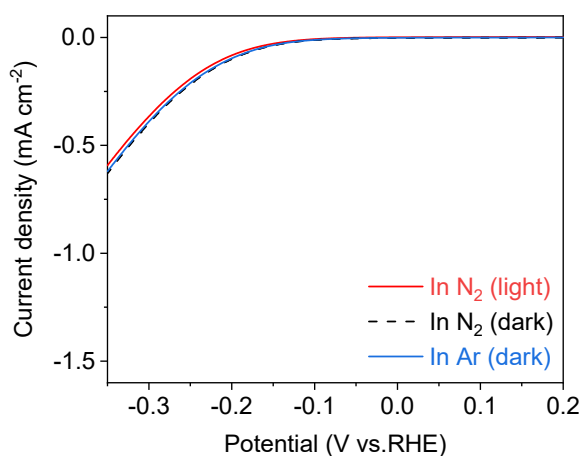

**Fig. S3** LSV curves of  $\text{TiO}_2$  under different conditions.

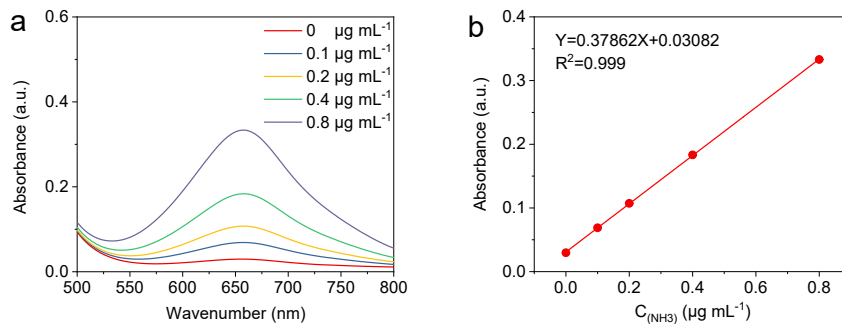

**Fig. S4** Calibration curve in 0.05 M  $\text{H}_2\text{SO}_4$  using ammonium chloride solutions of known concentrations as the standards: (a) UV-vis curves of indophenol assays after incubation for 2 hours; (b) Calibration curve used to determine the  $\text{NH}_3$  concentration.

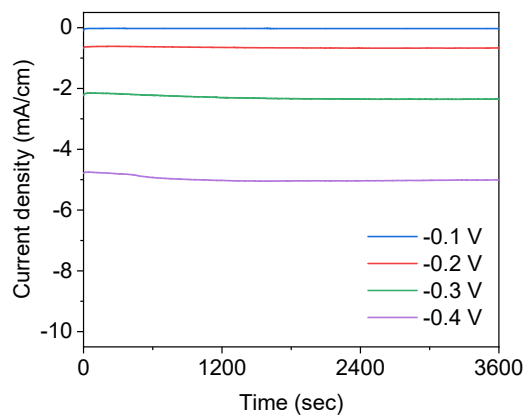

**Fig. S5** Chronoamperometric results of Au-TiO<sub>2</sub> at different potentials under illumination.

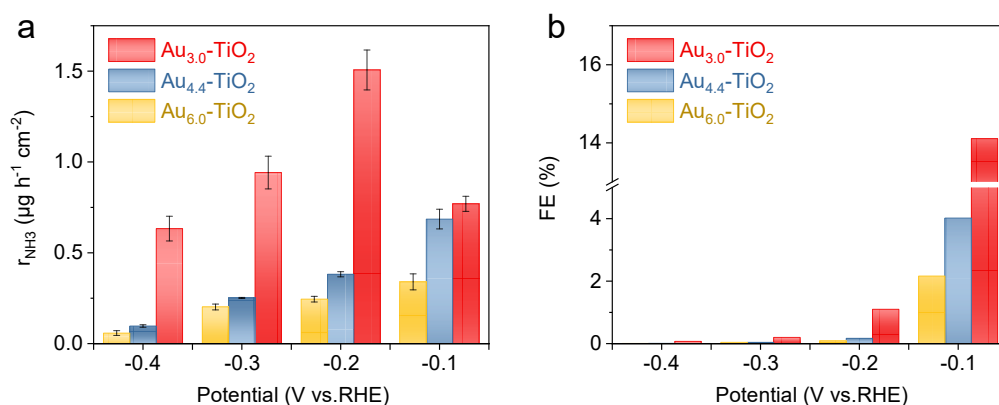

**Fig. S6** (a) Ammonia yield rate and (b) Faradaic efficiency of Au-TiO<sub>2</sub>.

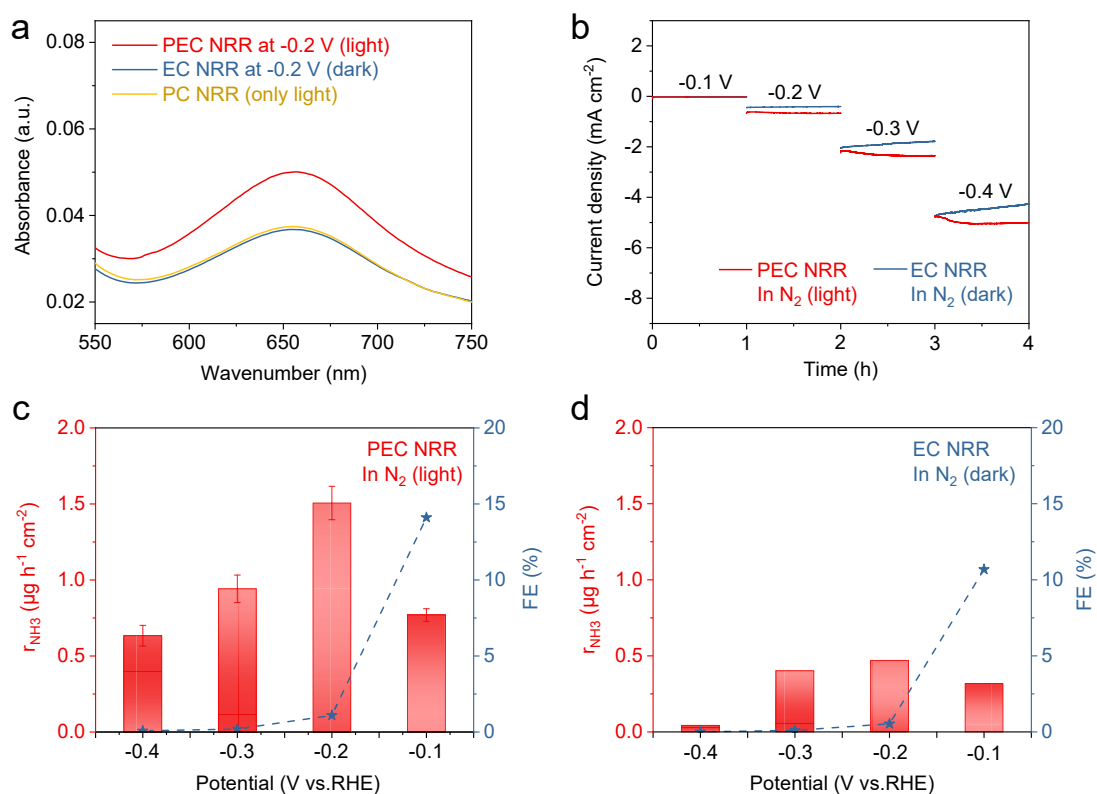

**Fig. S7** (a) Absorption spectra of  $\text{NH}_4^+$  ions detected by the indophenol blue chromogenic reaction; (b) EC NRR and PEC NRR current-time curves of the  $\text{Au}_{3.0}\text{-TiO}_2$  electrode for various potentials; (c) PEC-NRR ammonia yield rate and Faradaic efficiency; (d) EC-NRR ammonia yield rate and Faradaic efficiency.

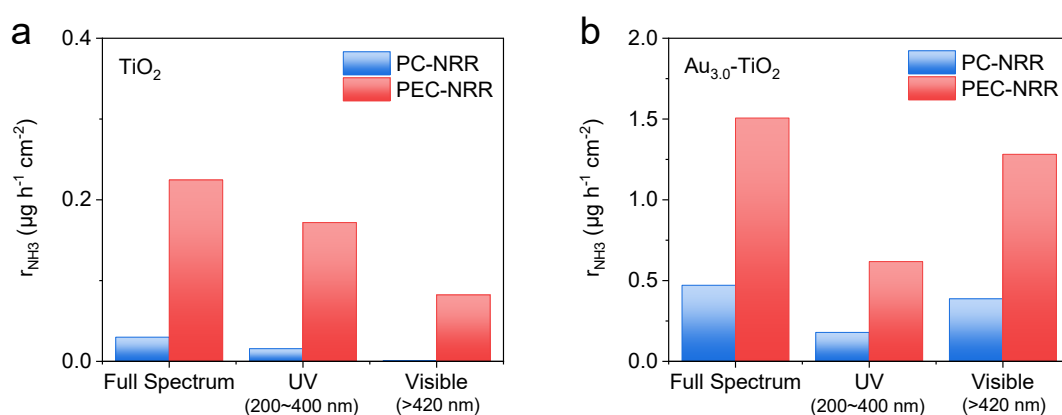

**Fig. S8**  $\text{NH}_3$  yields for PC-NRR and PEC-NRR of (a) $\text{TiO}_2$  and (b) $\text{Au}_{3.0}\text{-TiO}_2$  under different wavelength light illumination.



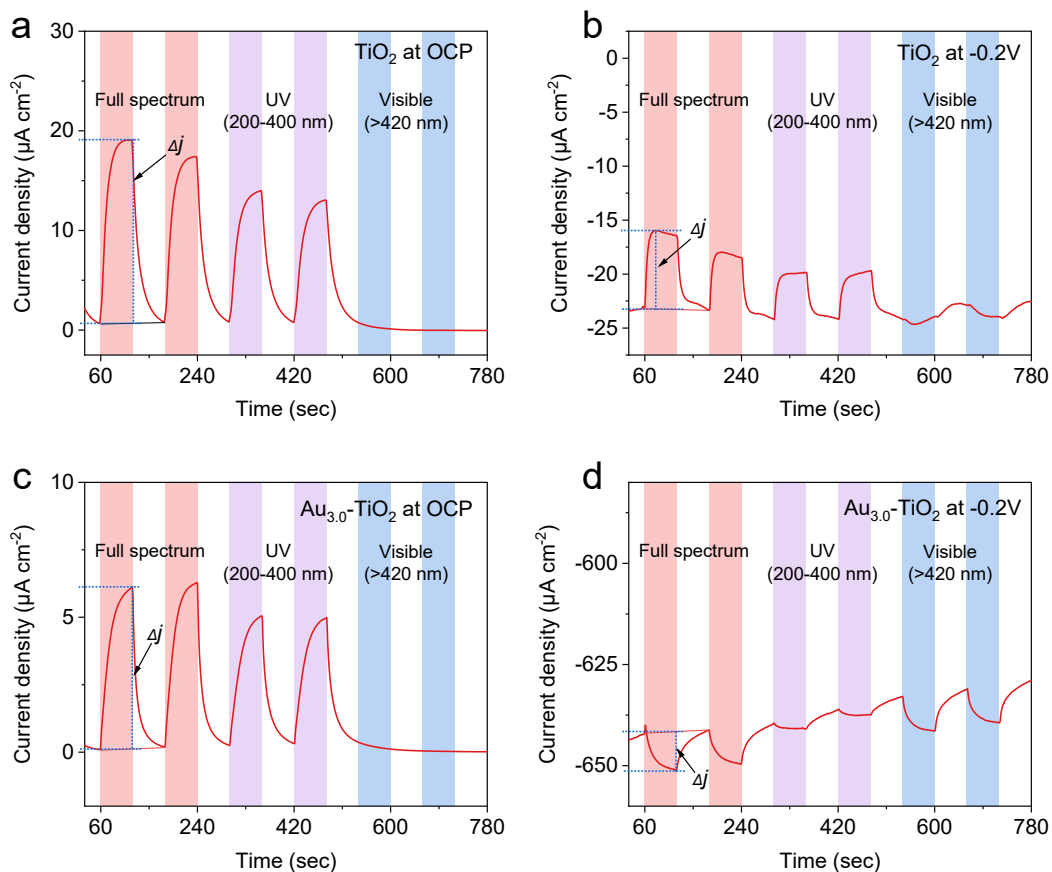

**Fig. S9** Photocurrent of (a)  $\text{TiO}_2$  at OCP; (b)  $\text{TiO}_2$  at -0.2 V; (c)  $\text{Au}_{3.0}\text{-TiO}_2$  at OCP and (d)  $\text{Au}_{3.0}\text{-TiO}_2$  at -0.2 V under different wavelength light illumination.

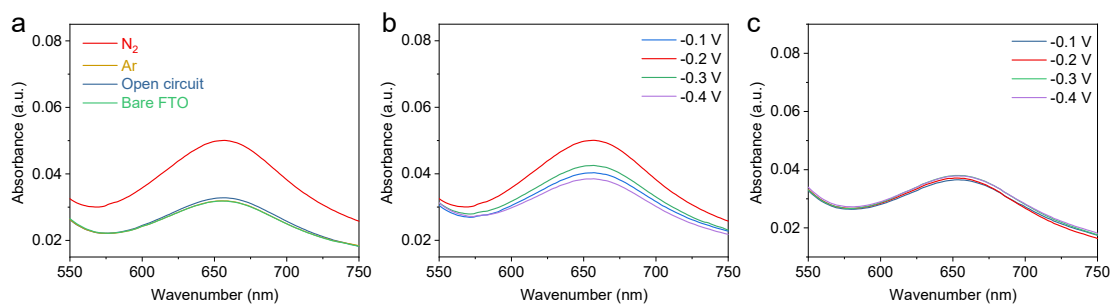

**Fig. S10** Absorption spectra of  $\text{NH}_4^+$  ions detected by the indophenol blue chromogenic reaction: (a) Control experiment; (b)  $\text{Au}_{3.0}\text{-TiO}_2$  and (c)  $\text{TiO}_2$ .

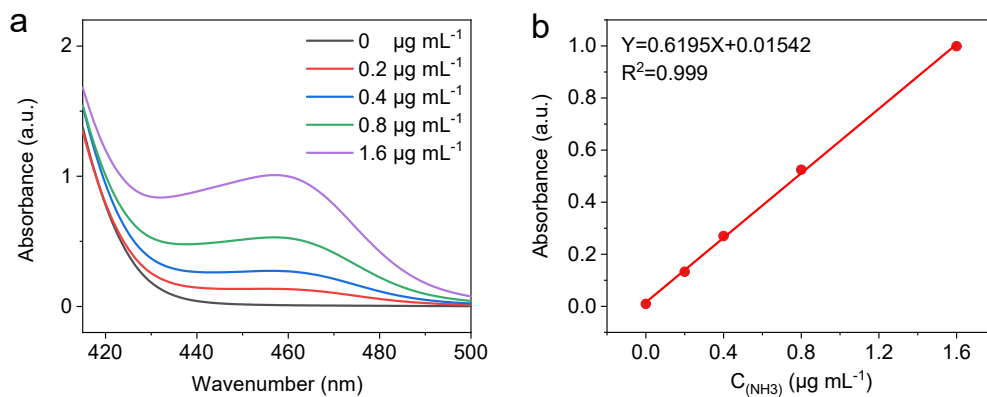

**Fig. S11** Calibration curve in 0.05 M  $\text{H}_2\text{SO}_4$  using hydrazine solutions of known concentrations as the standards: (a) UV-vis curves of various concentrations of hydrazine stained with  $\text{p-C}_9\text{H}_{11}\text{NO}$  indicator; (b) Calibration curve used to determine the hydrazine concentration.

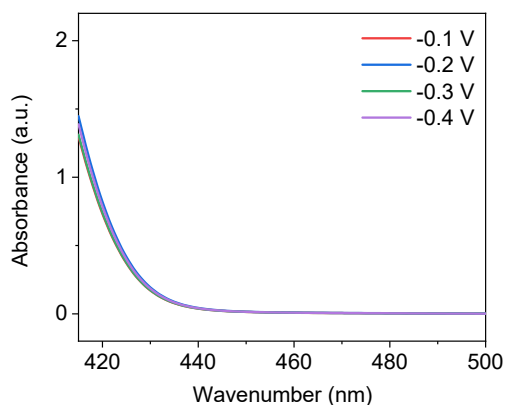

**Fig. S12** The absorption spectra of PEC NRR electrolyte for detecting hydrazine.

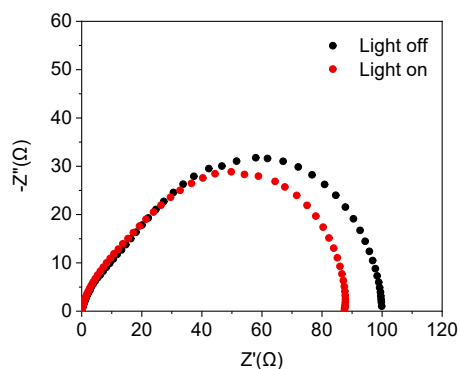

**Fig. S13** Electrochemical impedance Nyquist plots of the  $\text{Au}_{3.0}\text{-TiO}_2$  sample at

applied potential of -0.1 V vs. RHE in  $N_2$ -saturated 0.05M  $H_2SO_4$  electrolyte.

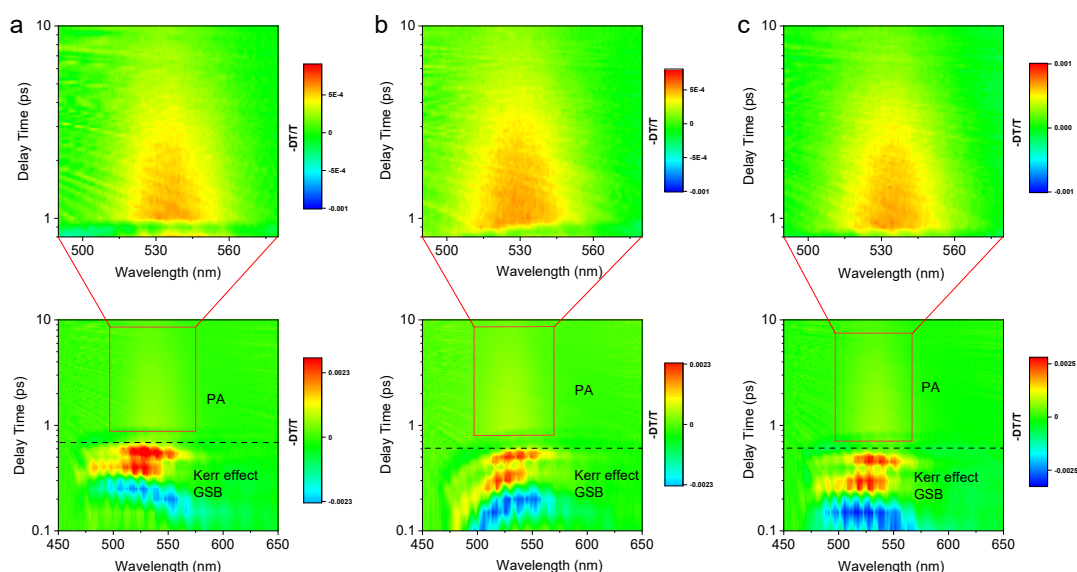

**Fig. S14** 3D contour plots of TAS observation: (a)  $Au_{3.0}$ - $TiO_2$ ; (b)  $Au_{4.4}$ - $TiO_2$  and (c)  $Au_{6.0}$ - $TiO_2$ .

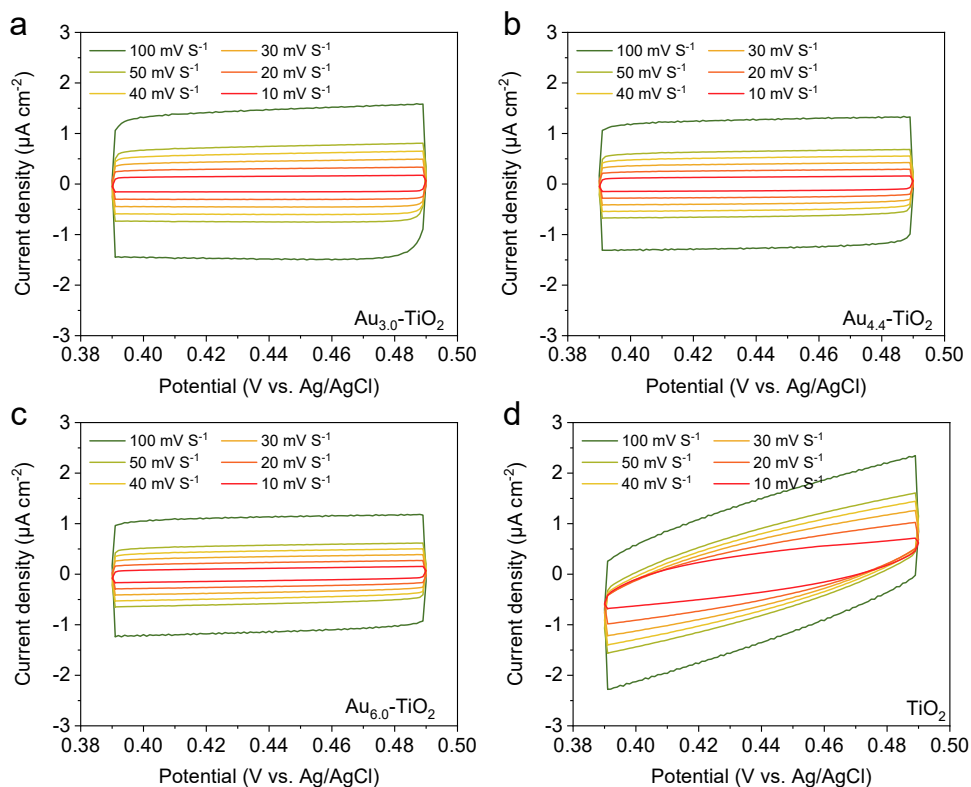

**Fig. S15** CV conducted at potentials from -0.49 to 0.39 V vs Ag/AgCl at scanning rates of 10, 20, 30, 40, 50 and 100  $mV \cdot s^{-1}$  for (a)  $Au_{3.0}$ - $TiO_2$ , (b)  $Au_{4.4}$ - $TiO_2$ , (c)  $Au_{6.0}$ - $TiO_2$  and (d)  $TiO_2$ .

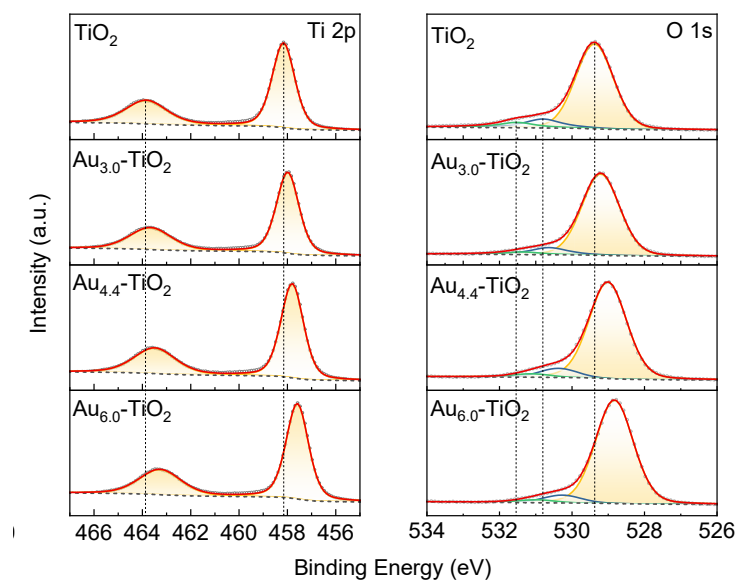

**Fig. S16** High-resolution XPS spectra in the Ti 2p and O 1s regions.

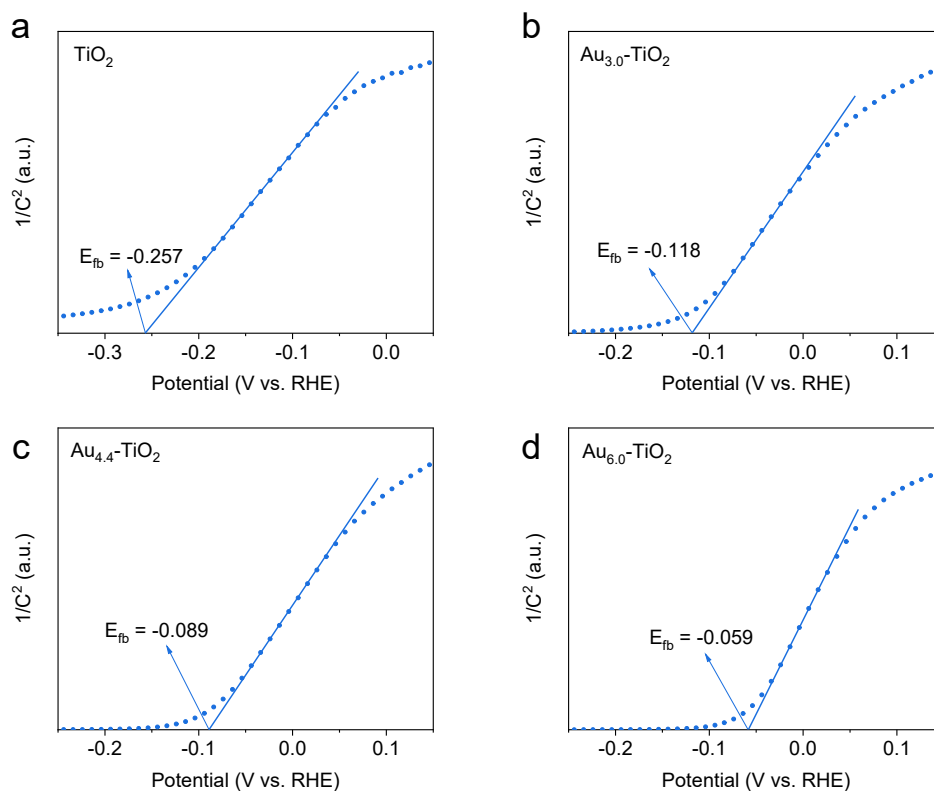

**Fig. S17** Mott-Schottky plot of the samples.

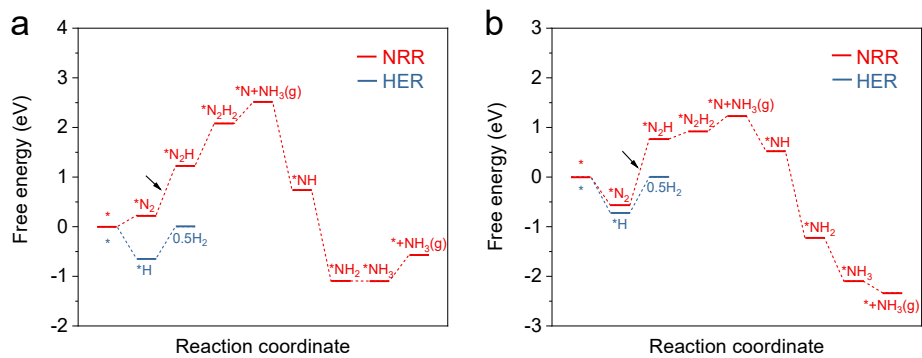

**Fig. S18** Calculated free-energy diagrams of NRR and HER on (a) Au<sub>5</sub>-TiO<sub>2</sub> and (b) Au<sub>L</sub>-TiO<sub>2</sub>.
